# Supplementary material for: Enhancement of Naringenin Bioavailability by Complexation with Hydroxypropoyl-β-Cyclodextrin
Source: PubMed Central journal article supplement (PMC3071816; doi:10.1371/journal.pone.0018033), 2011-04-06

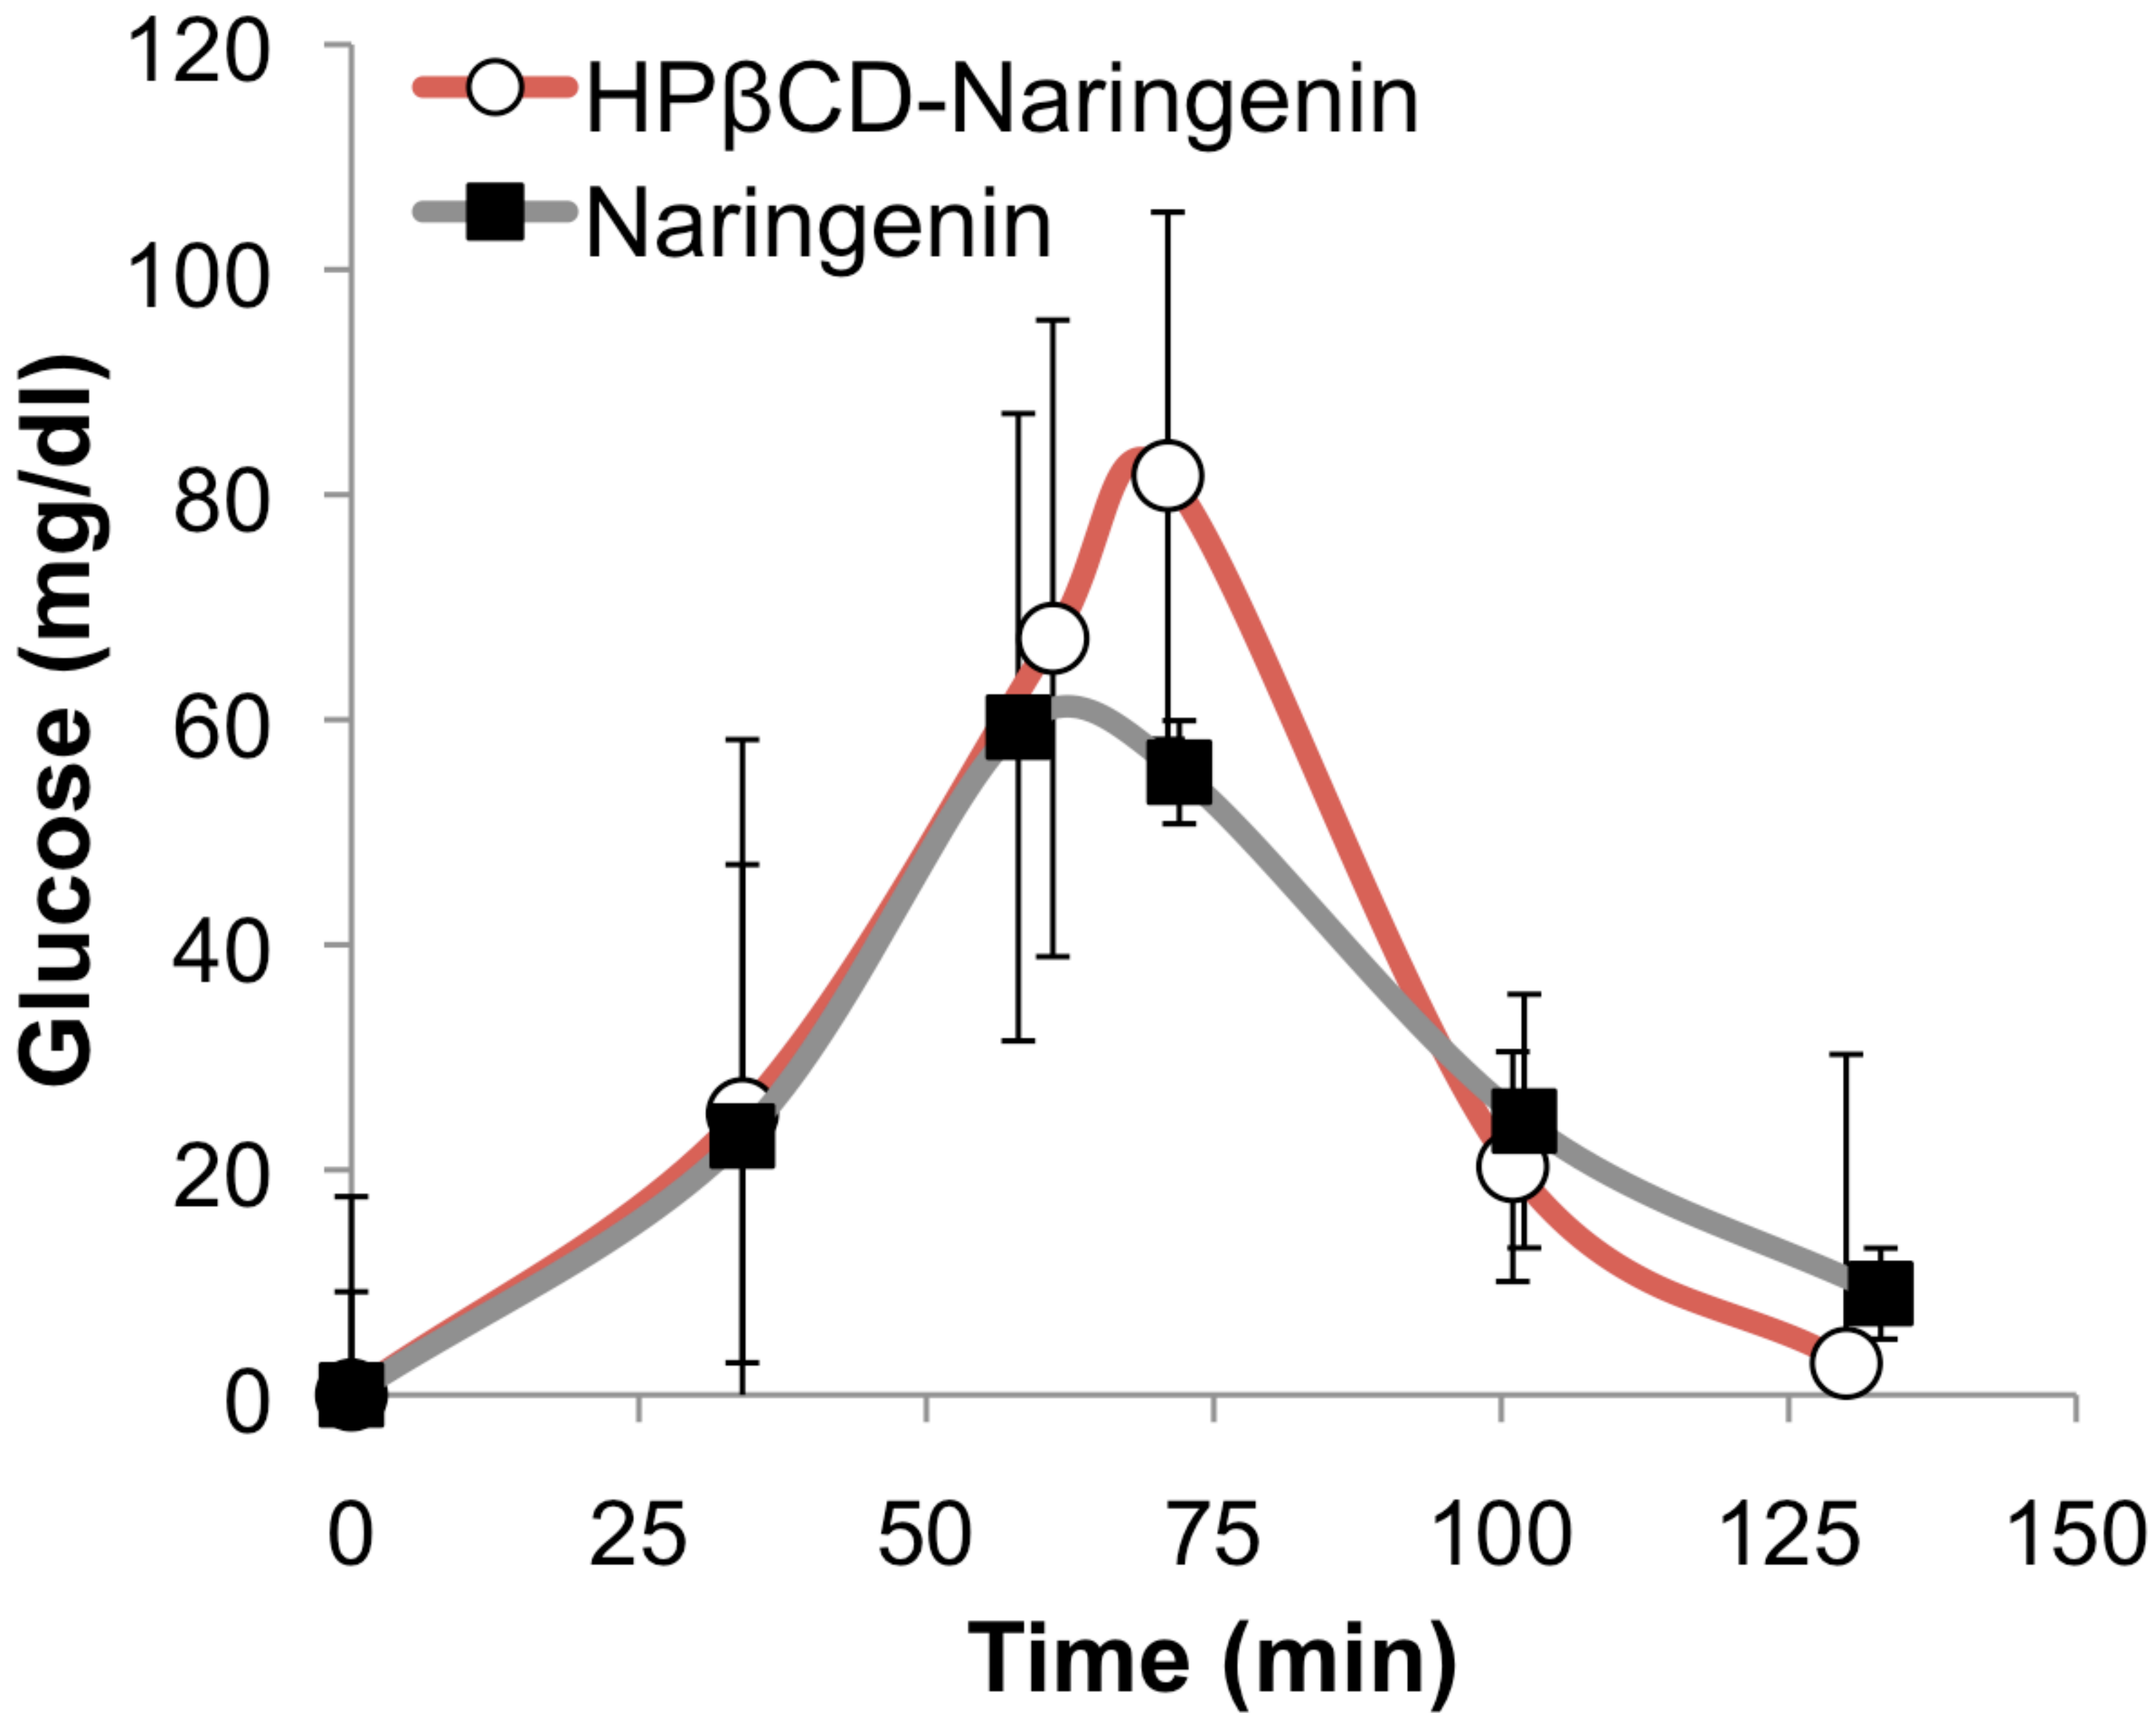

Supplement: pone.0018033.s001.pdf [file pone.0018033.s001.pdf]
